# Supplementary material
Source: Royal Society of Chemistry journal article supplement (doi:10.1039/d6ta01659f)
Supplement: d6ta01659f1.pdf [file d6ta01659f1.pdf]

## Supplementary Information for

# **Trade-off between O<sub>2</sub> activation and active-site regeneration on biaxially strained Co-doped MoS<sub>2</sub> monolayers: a density functional theory study**

Soon-Dong Park <sup>a</sup> and Sung Youb Kim <sup>a,b\*</sup>

<sup>a</sup> Graduate School of Carbon Neutrality, Ulsan National Institute of Science and Technology, Ulsan 44919, Republic of Korea

<sup>b</sup> Graduate School of Semiconductor Materials and Devices Engineering, Ulsan National Institute of Science and Technology, Ulsan 44919, Republic of Korea

\* Corresponding author: [sykim@unist.ac.kr](mailto:sykim@unist.ac.kr)

**Table S1.** O–O stretching frequencies ( $\nu_{\text{O-O}}$ ) for  $\text{O}_2$  adsorbed at the Co substitutional site ( $\text{Co@V}_\text{S}$ ) in monolayer  $\text{MoS}_2$  under biaxial tensile strain ( $\varepsilon = 0\text{--}10\%$ ). The data include both S-preserved (SP) and S-reconstructed (SR) adsorption configurations, as well as their coexistence at  $\varepsilon = 4.5\%$ . The experimental equilibrium stretching frequency of gas-phase  $\text{O}_2$  is  $1556\text{ cm}^{-1}$ ,<sup>53</sup> while our PBE calculation predicts  $1567\text{ cm}^{-1}$  at an equilibrium bond length of  $1.233\text{ \AA}$ , indicating good agreement.

| Strain | Configuration | $\nu_{\text{O-O}}\text{ (cm}^{-1}\text{)}$ |
|--------|---------------|--------------------------------------------|
| 0.000  | SP            | 1057.334                                   |
| 0.020  | SP            | 1046.939                                   |
| 0.040  | SP            | 1034.964                                   |
| 0.045  | SP            | 1032.449                                   |
| 0.045  | SR            | 988.309                                    |
| 0.075  | SR            | 992.290                                    |
| 0.100  | SR            | 998.243                                    |

For the adsorbed configurations, the O–O stretching frequencies reported in Table S1 correspond to a local O–O stretching mode, obtained by displacing only the two O atoms along the O–O bond direction while keeping the  $\text{MoS}_2$  substrate and the Co atom fixed.

**Table S2.** Strain dependence of the Co–O bond strength during Steps IV–V (lateral diffusion of the Co-bound O to a neighboring S site), quantified by  $-ICOHP$  (integrated up to the Fermi level) as obtained from LOBSTER for the initial state of Step IV. A larger  $-ICOHP$  value indicates a stronger Co–O interaction.

| Strain | $-ICOHP$ |
|--------|----------|
| 0.000  | 4.885    |
| 0.055  | 5.821    |

**Table S3.** PBE+U sensitivity test results for the Co@V<sub>S</sub>-O<sub>2</sub> system ( $U_{\text{eff}} = 3.3$  eV for Co  $d$  electrons, following Oh et al.<sup>49</sup>).  $E_{\text{SR}} - E_{\text{SP}}$  is the energy difference between the SR and SP configurations at each strain. A negative value indicates that the SR configuration is thermodynamically favored.

| Strain | SR converged?        | $M_{\text{tot}}$ (SR) ( $\mu_{\text{B}}$ ) | $E_{\text{SR}} - E_{\text{SP}}$ (eV) |
|--------|----------------------|--------------------------------------------|--------------------------------------|
| 0.000  | No (collapses to SP) |                                            |                                      |
| 0.045  | YES                  | $\sim 1$                                   | +0.56                                |
| 0.050  | Yes                  | $\sim 1$                                   | +0.43                                |
| 0.055  | Yes                  | $\sim 1$                                   | +0.29                                |

Under PBE+U, the SP–SR crossover is estimated to shift to approximately 7% by linear extrapolation of the  $E_{\text{SR}} - E_{\text{SP}}$  trend, compared to approximately 4.5% under PBE. However, the SR configuration remains a well-defined metastable minimum at all tested strains with the expected low-spin magnetic moment ( $\sim 1 \mu_{\text{B}}$ ), and the energy difference decreases monotonically with strain, confirming that the same strain-driven crossover mechanism is preserved. At zero strain, the PBE and PBE+U results yield consistent structural and magnetic properties. No consensus  $U$  value has been calibrated specifically for TM@V<sub>S</sub> configurations in MoS<sub>2</sub>, and the quantitative crossover strain is therefore sensitive to this parameter, while the qualitative activation–regeneration trade-off mechanism remains valid.

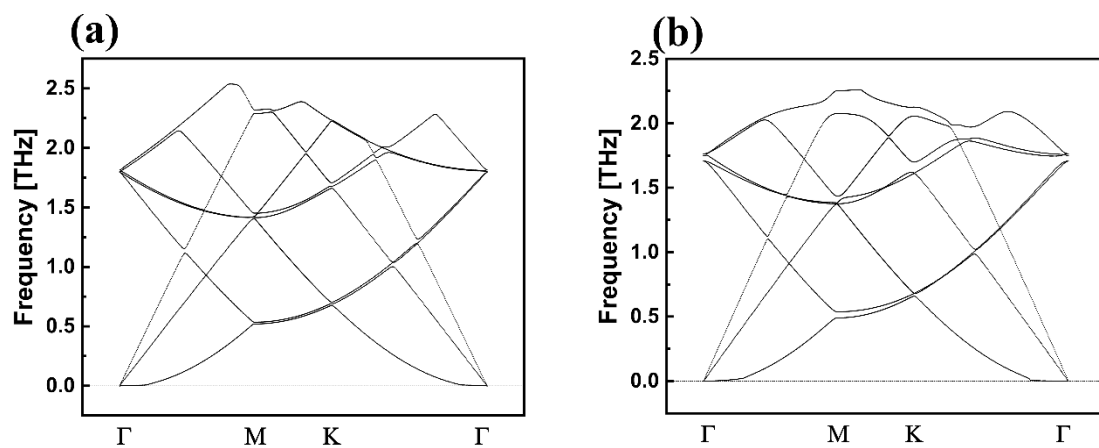

**Figure S1.** Phonon dispersion curves of monolayer  $MoS_2$  under 10% biaxial tensile strain for (a) a single sulfur vacancy ( $V_S$ ) and (b) a substitutional Co atom at the sulfur vacancy site ( $Co@V_S$ ).

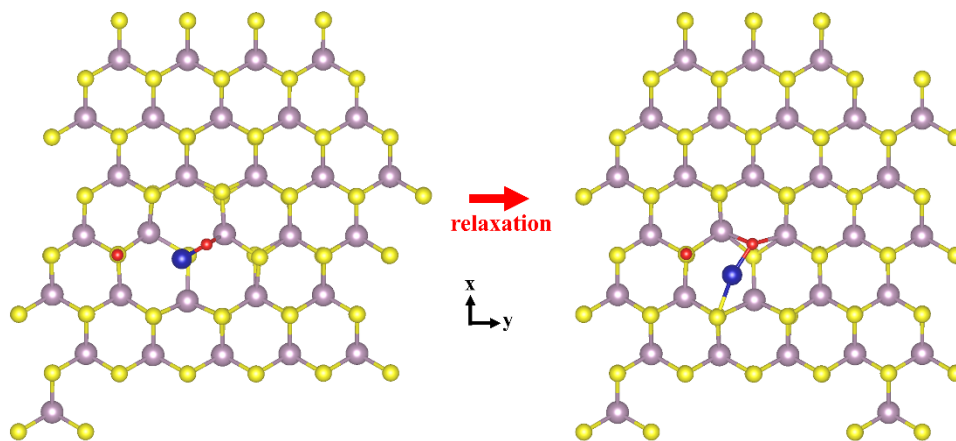

**Figure S2.** Active-site disruption caused by subsurface oxygen penetration at lower biaxial tensile strains. Representative snapshots during structural relaxation reveal that, starting from the post-dissociation configuration, the remaining O atom migrates into the subsurface region and displaces the Co dopant, triggering an irreversible local reconstruction (shown here for  $\epsilon = 4.5\%$ ). Similar trap-forming behavior is also observed at  $\epsilon = 5.0\%$  for the same initial configuration. In contrast, at  $\epsilon \geq 5.5\%$ , the O atom remains stabilized at the Co-top site without causing such disruption, resulting in a well-defined, intact intermediate that serves as the starting point for the regeneration pathway.

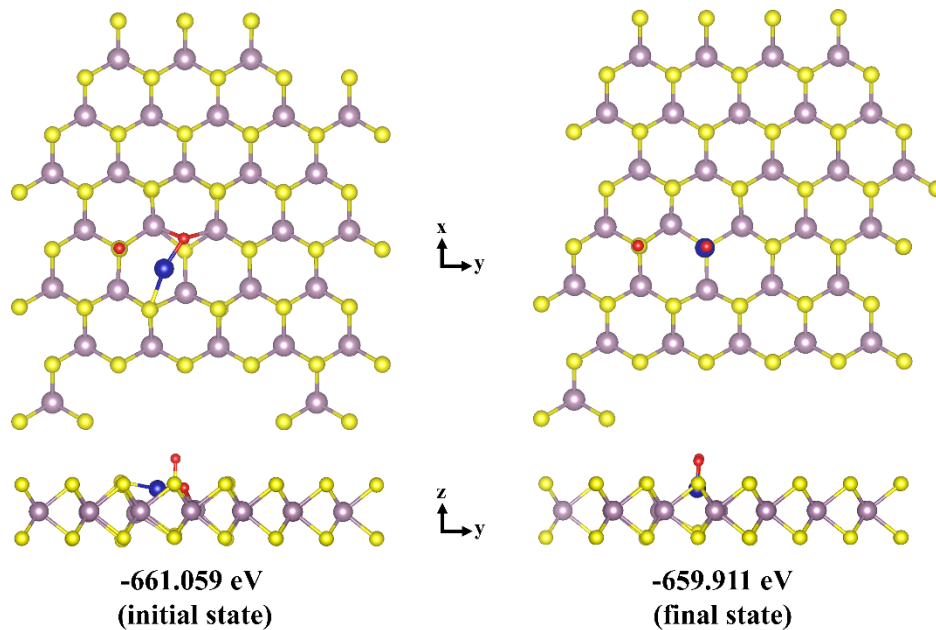

**Figure S3.** Energetic penalty for escaping the penetrated Co–O–Mo trap at  $\varepsilon = 4.5\%$ . The structure shown is a representative snapshot at this strain. Similar energy comparisons were also conducted at  $\varepsilon = 5.0\%$ , and the resulting  $\Delta E$  values are summarized below.

On the left, the relaxed dissociation product transforms into a penetrated Co–O–Mo motif, representing a trapped (disrupted) configuration accompanied by significant local rearrangement. On the right, representative recovery endpoints are presented as candidate states for initiating subsequent lateral migration, in which one O atom is relocated to the Co-top position. The numbers below each snapshot indicate the total energies (in eV) of the corresponding optimized structures (rounded to three decimal places), calculated using the same  $5 \times 3$  MoS<sub>2</sub> supercell and DFT settings. Relative energies are defined as  $\Delta E = E_{\text{end}} - E_{\text{trap}}$ , resulting in values of approximately 1.15 and 1.23 at strain levels  $\varepsilon = 4.5\%$  and  $5.0\%$ , respectively. These positive  $\Delta E$  values suggest that escaping the penetrated Co–O–Mo trap is thermodynamically unfavorable within the  $\varepsilon = 4.5\text{--}5.0\%$  range in our lattice-oxygen-migration proxy for regeneration, and they indicate a substantial energetic penalty for recovery.

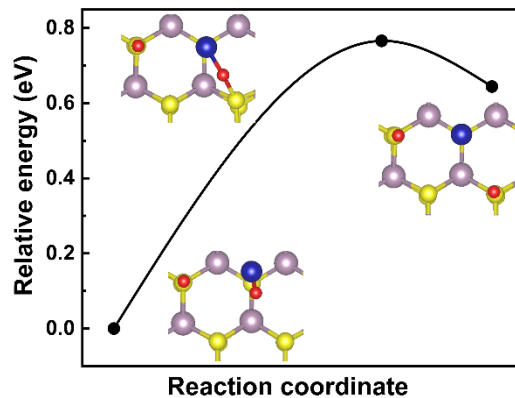

**Figure S4.** Minimum-energy pathway for the lateral diffusion of a Co-bound oxygen atom to a neighboring S site on Co-doped MoS<sub>2</sub> under zero strain ( $\epsilon = 0\%$ ). The calculated activation barrier is approximately 0.77 eV. In comparison, the barrier increases to 1.63 eV at a tensile strain of  $\epsilon = 5.5\%$  (Figure 6), demonstrating that tensile strain significantly raises the energy required for oxygen removal and thus impedes active-site regeneration.
